# Supplementary material for: Urinary Medium-Chained Acyl-Carnitines Sign High Caloric Intake whereas Short-Chained Acyl-Carnitines Sign High -Protein Diet within a High-Fat, Hypercaloric Diet in a Randomized Crossover Design Dietary Trial
Source: MDPI journal article supplement (doi:10.3390/nu13041191), 2021-04-03

Figure 2

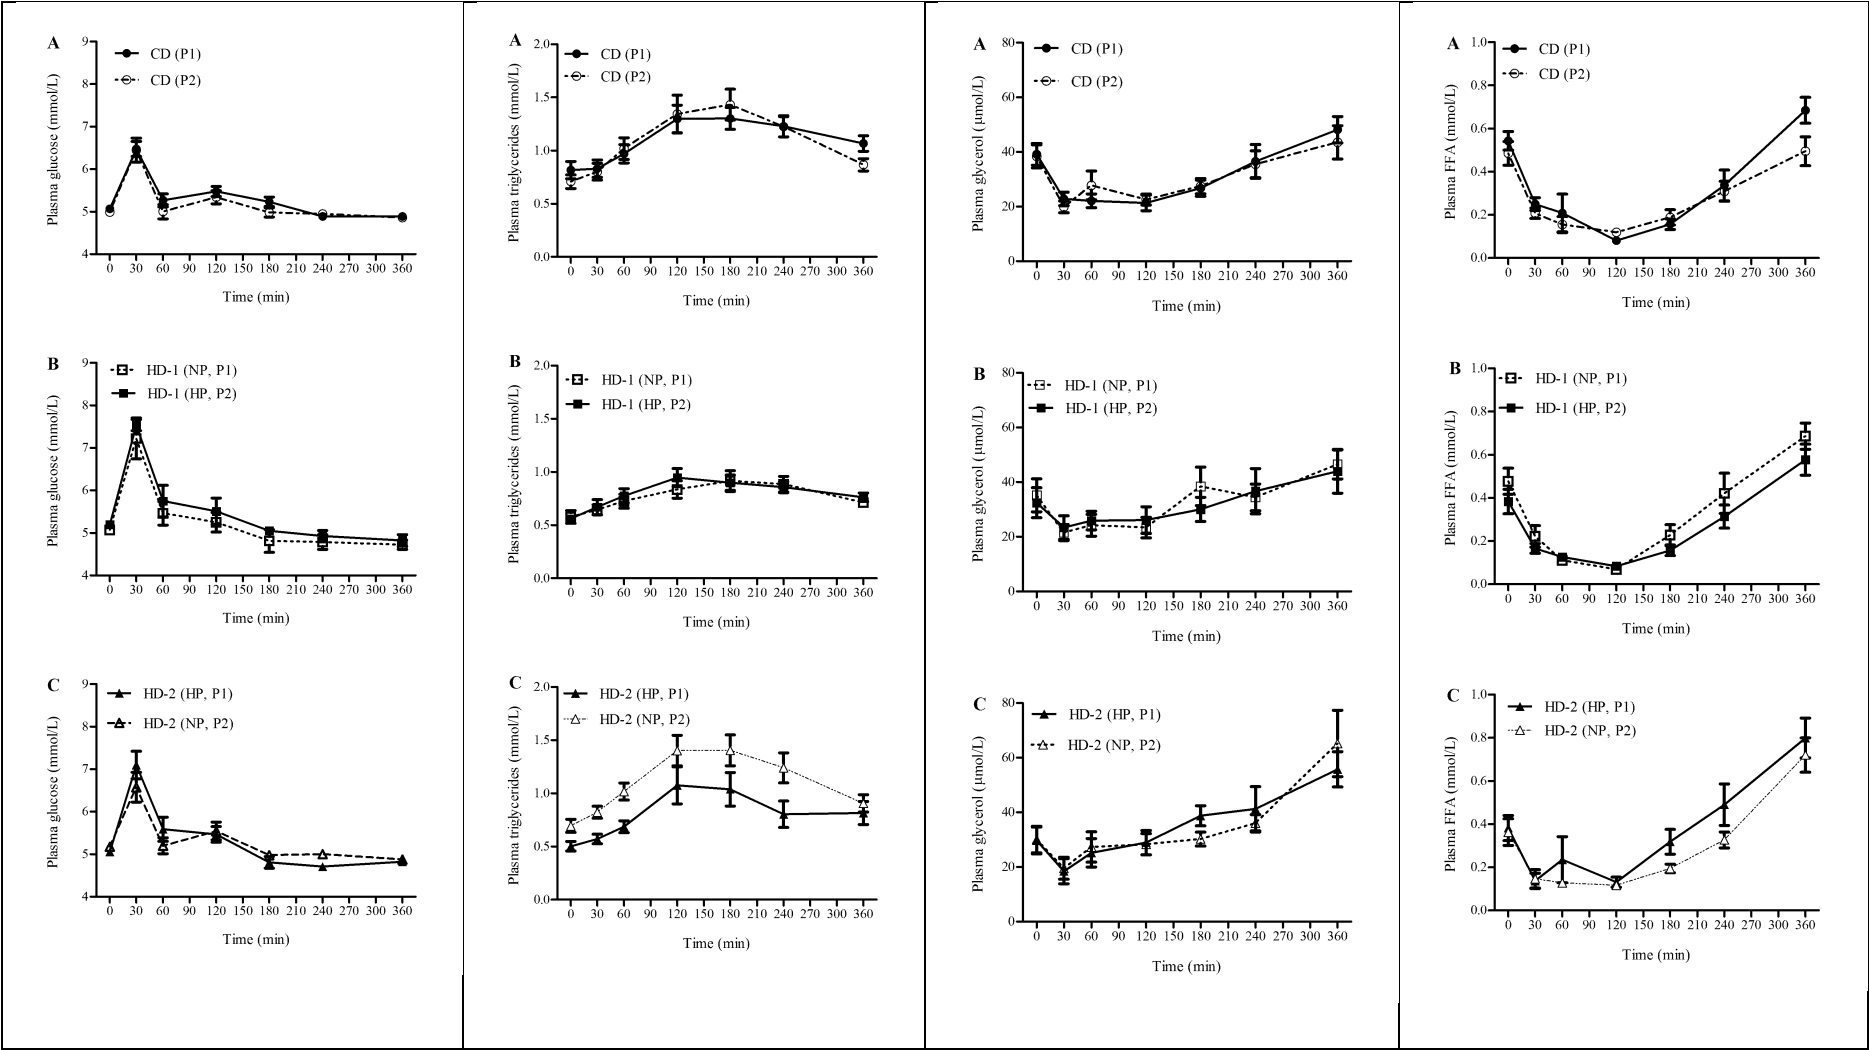

Figure 3

A

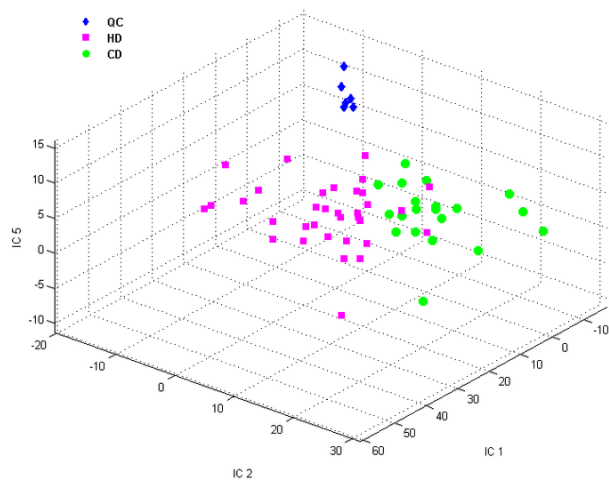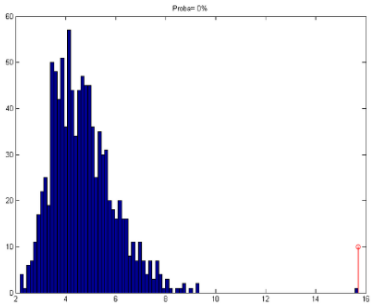

B

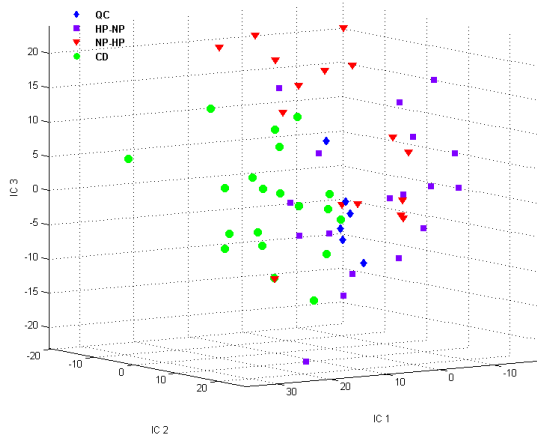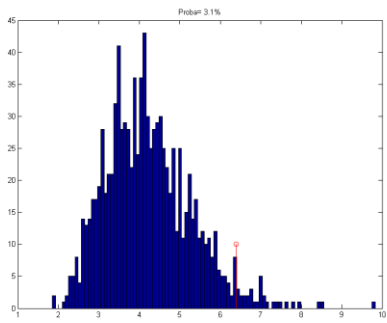

C

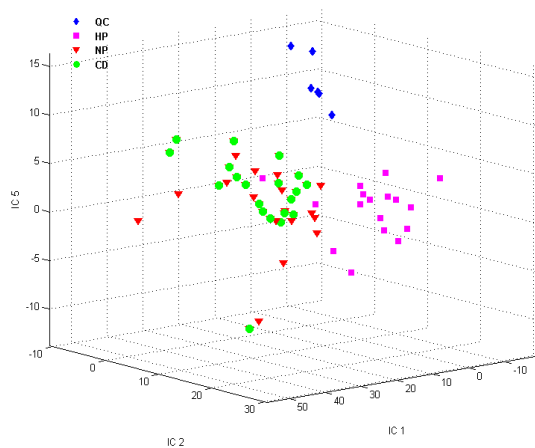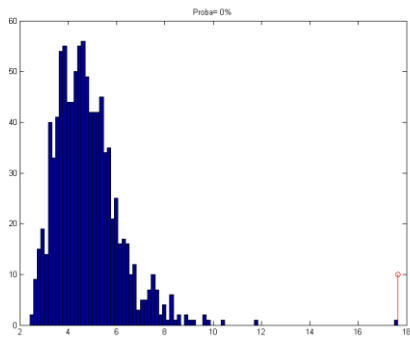

Figure 4

A

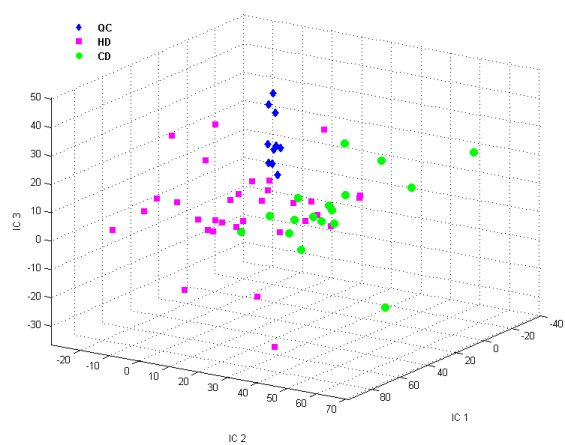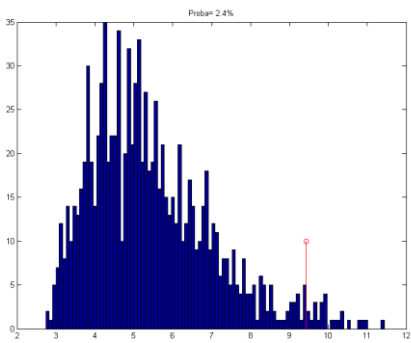

B

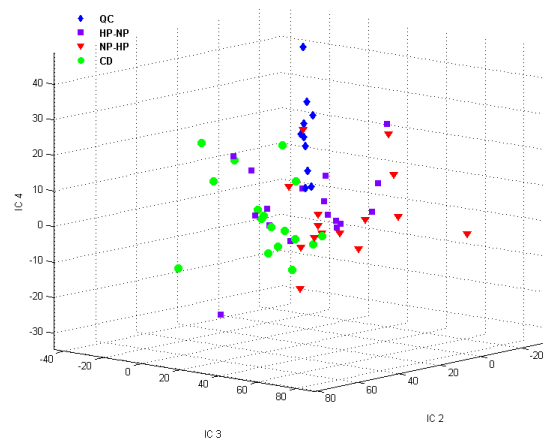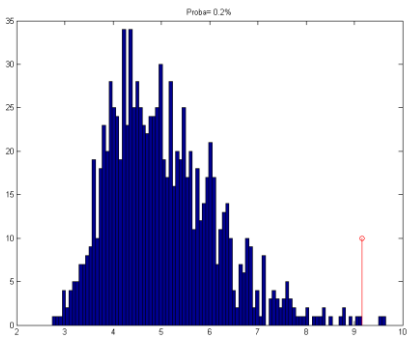

C

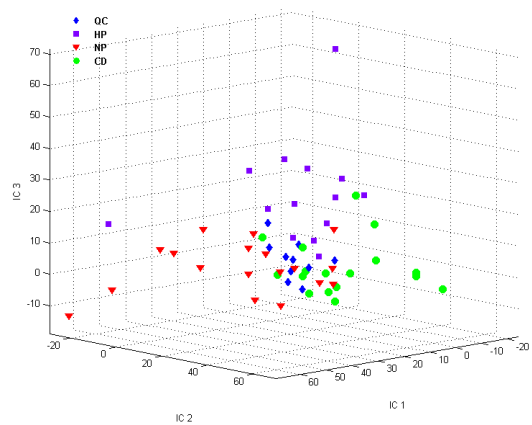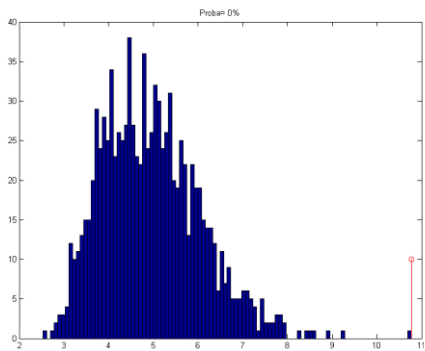

**Figure 5**

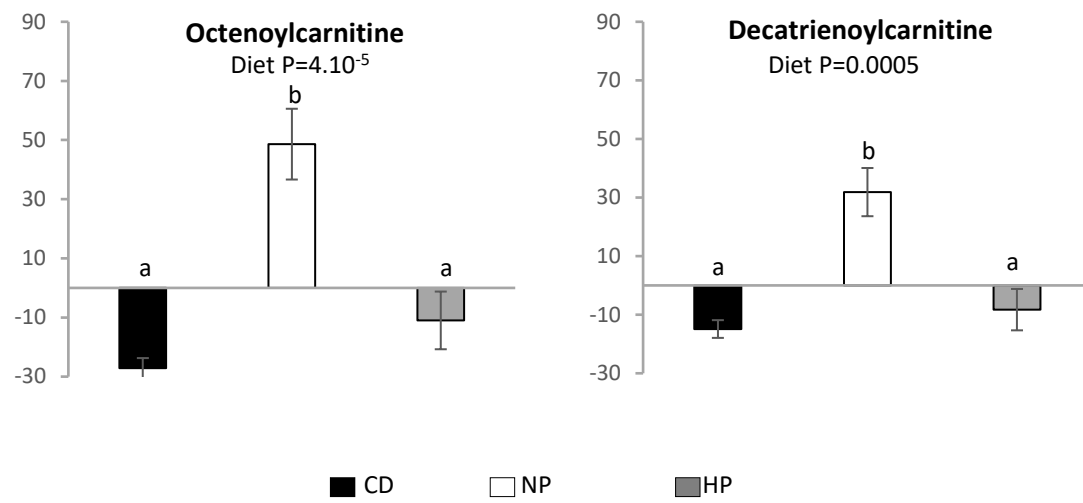

Figure 6

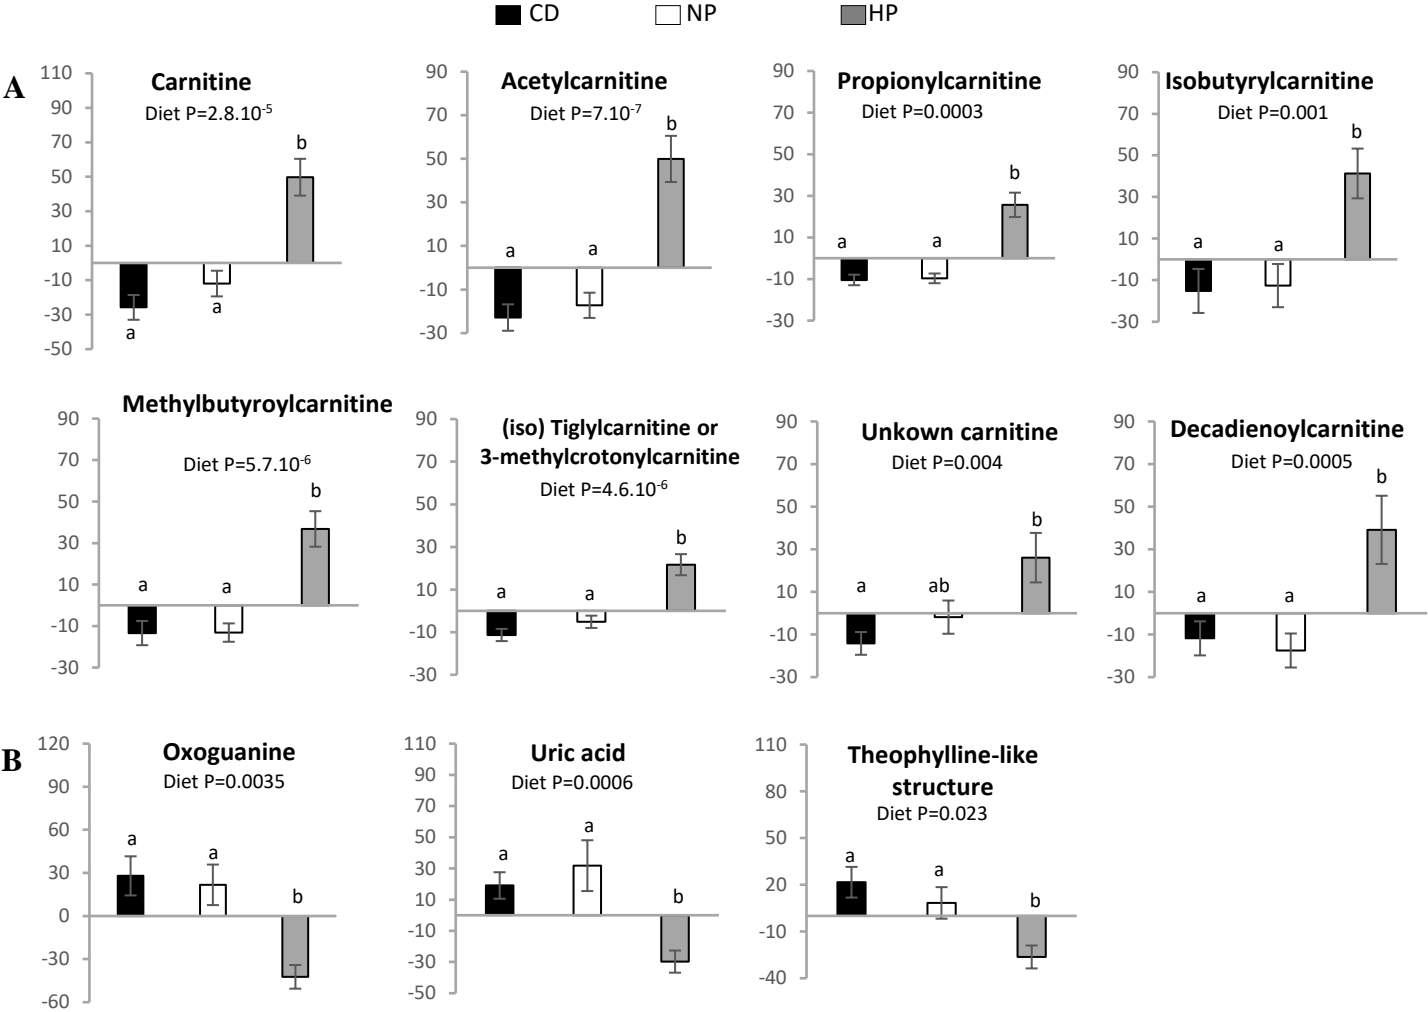

**Figure 7**

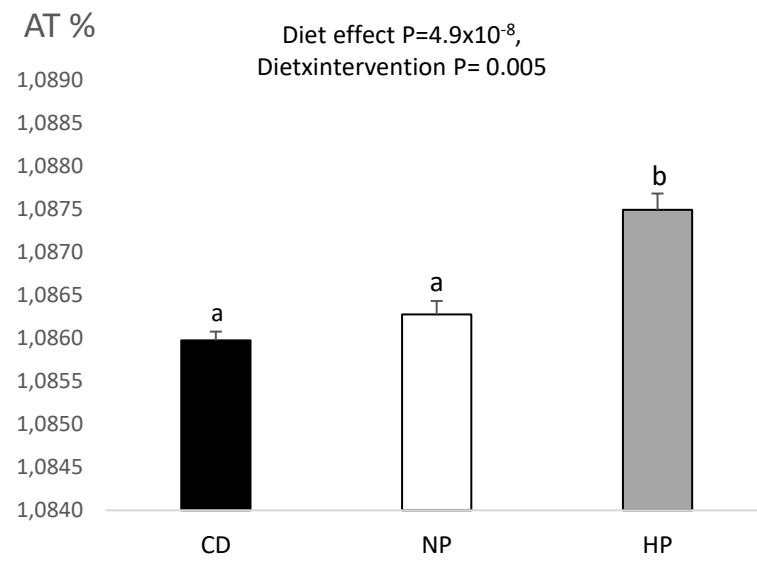

**Figure S1:**  $^{13}\text{C}$  enrichment observed in 24h urines of participants, in all dietary groups; participants were adapted to either a CD for 4 weeks (n=10) or a HD differing in protein content, NP vs. HP in random order (NP-HP, n=8; HP-NP, n=9), P1 and P2. Data are mean  $\pm$  SEM. The *P* value is indicated on graph, when the difference is to be significant, for the diet and period effect (ANOVA). When the effect is significant, different letters indicated significant differences between groups. CD, control diet; NP, Normal protein, high-fat, hypercaloric diet; HP, High protein, high-fat, hypercaloric diet.

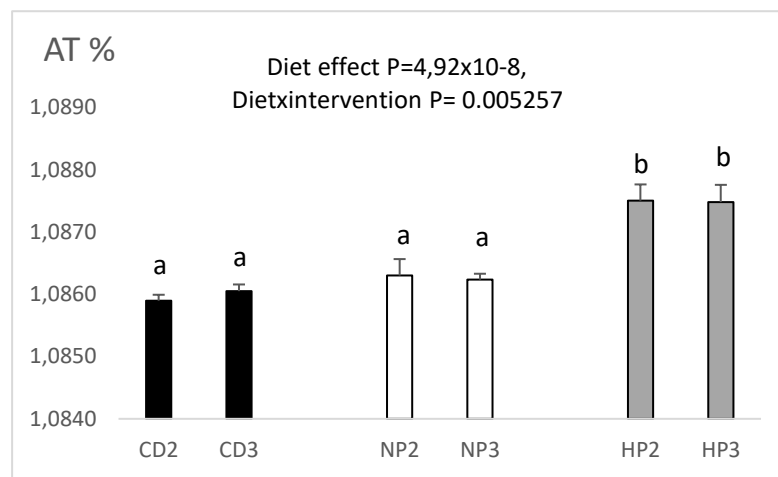

**Figure S2.** Identification of acetylcarnitine ( $\text{C}_9\text{H}_{18}\text{NO}_4$ ). **A** MS-MS spectrum of the peak characterized by  $R_T$  0.50 min,  $[\text{M}+\text{H}]^+ = 204.1216$  obtained with a collision trap energy = 15 eV; **B** – MS-MS spectrum of authentic standard of acetylcarnitine.

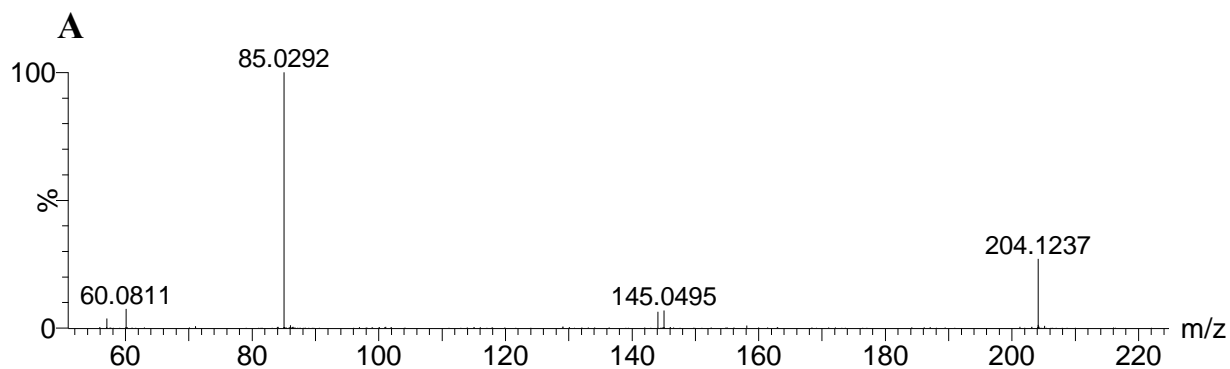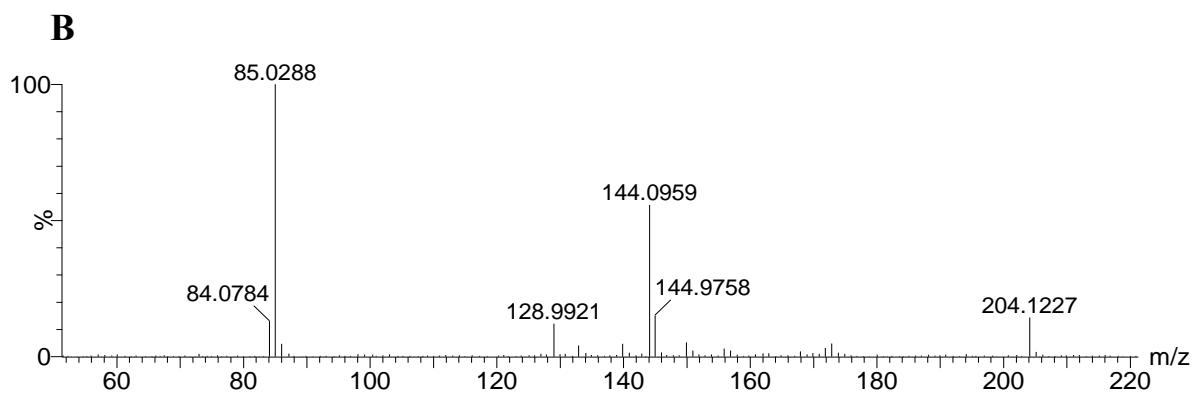



**Figure S3.** Identification of propionylcarnitine ( $C_{10}H_{20}NO_4$ ). **A** MS-MS spectrum of the peak characterized by  $R_T$  0.59 min,  $[M+H]^+ = 218.1374$  obtained with a collision trap energy = 15 eV; **B** – MS-MS spectrum of authentic standard of propionylcarnitine.

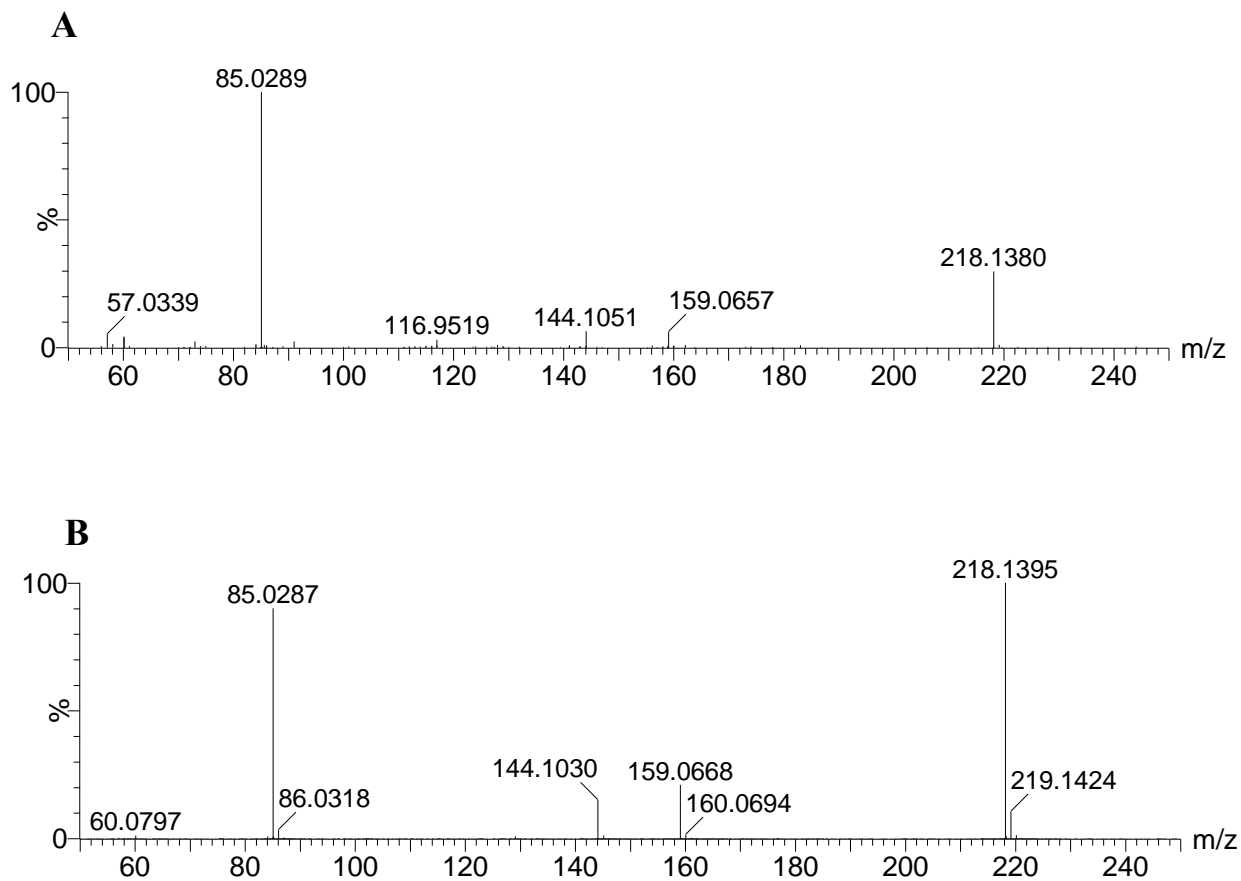

**Figure S4.** Identification of isobutyrylcarnitine ( $C_{11}H_{22}NO_4$ ). **A** MS-MS spectrum of the peak characterized by  $R_T$  0.70 min,  $[M+H]^+ = 232.1529$  obtained with a collision trap energy = 15 eV; **B** – MS-MS spectrum of authentic standard of isobutyrylcarnitine.

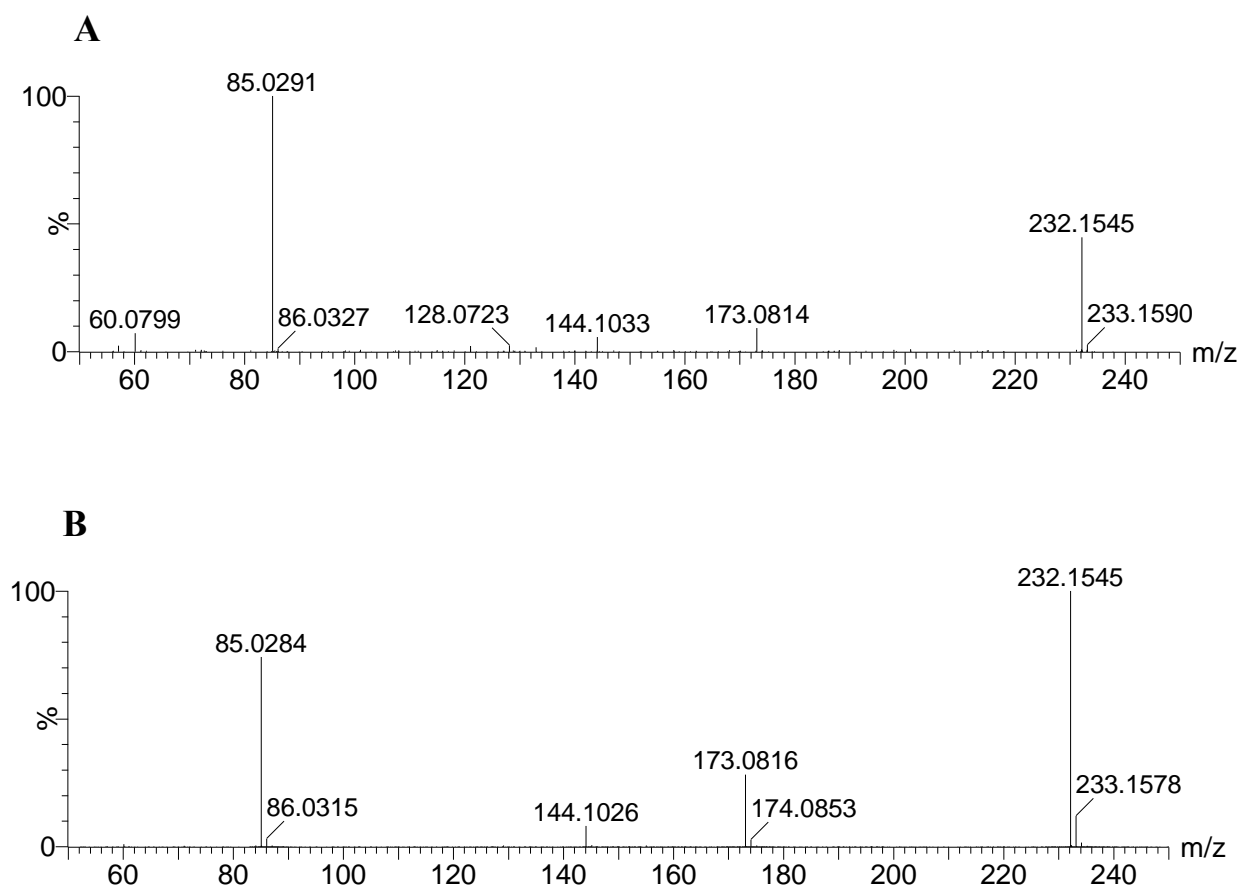

**Figure S5.** Identification of carnitine ( $C_7H_{16}NO_3$ ). **A** – MS-MS spectrum of the peak characterized by  $R_T$  0.48 min,  $[M+H]^+ = 162.1114$  obtained with a collision trap energy = 20 eV; **B** – MS-MS spectrum of authentic standard of carnitine.

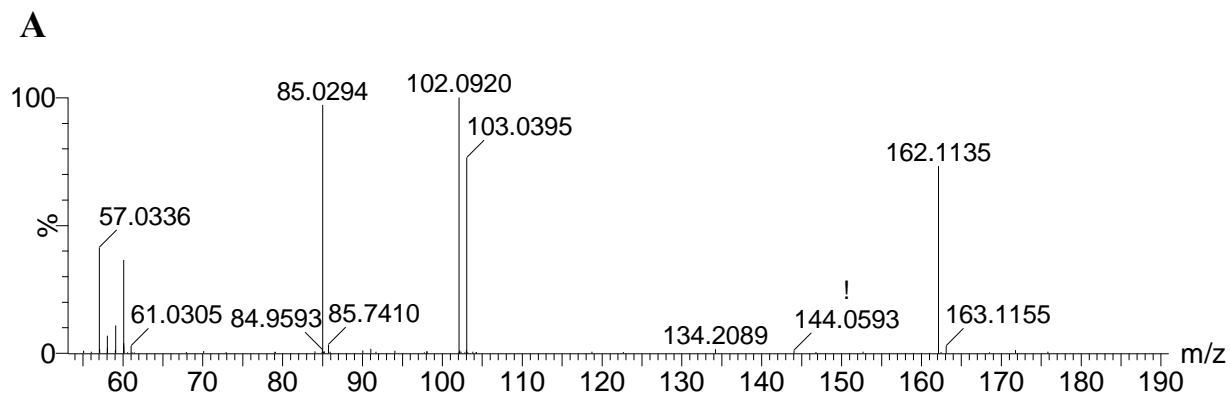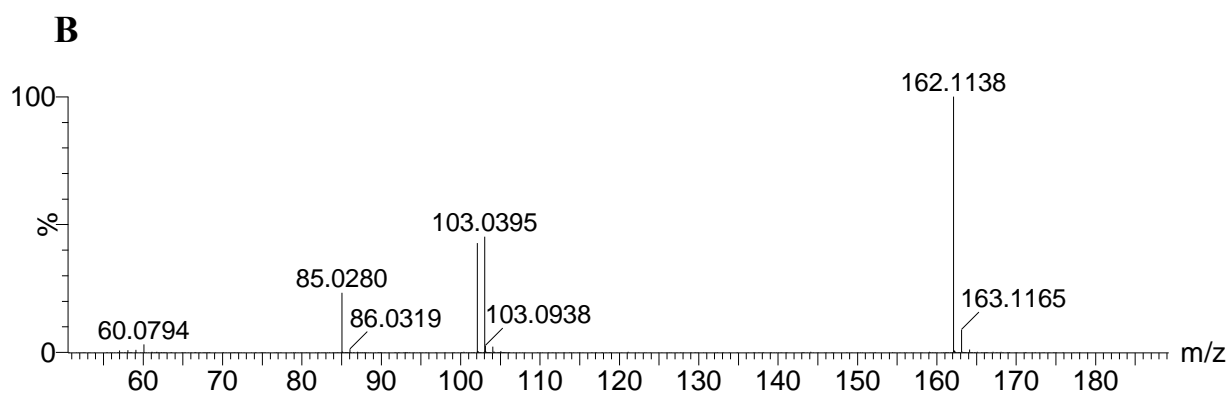

**Figure S6.** Identification of uric acid ( $C_5H_5N_4O_3$ ). **A** – MS-MS spectrum of the peak characterized by  $R_T$  0.66 min,  $[M+H]^+ = 169.0355$  obtained with a collision trap energy = 20 eV; **B** – MS-MS spectrum of authentic standard of uric acid.

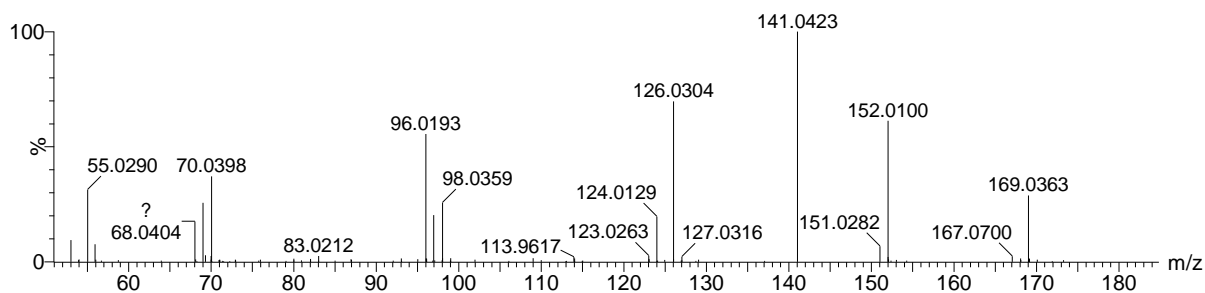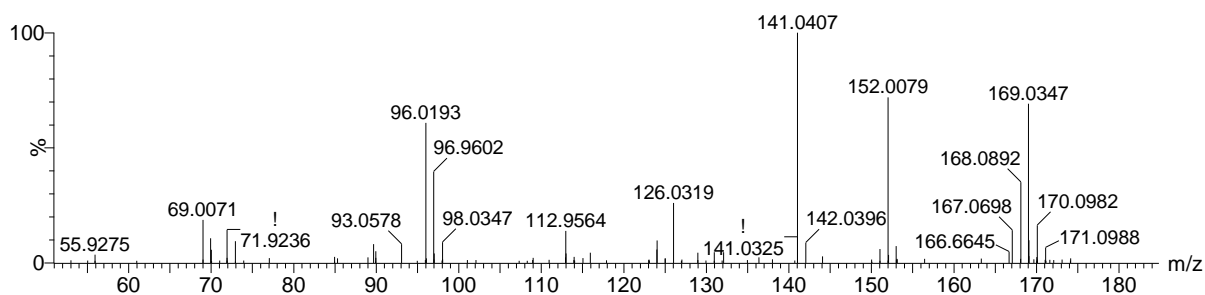

Supplement: s1 [file s1]
